# Supplementary material for: RNAi-mediated silencing of SOD1 profoundly extends survival and functional outcomes in ALS mice
Source: PubMed Central journal article supplement — bioRxiv. 2024 Jun 25:2024.06.20.599943. Preprint. [Version 1] doi: 10.1101/2024.06.20.599943 (PMC11230209; doi:10.1101/2024.06.20.599943), 2024-06-25
Supplement: media-1.pdf [file media-1.pdf]

## Supplementary Materials

**Title:** RNAi-mediated silencing of SOD1 profoundly extends survival and functional outcomes in ALS mice

**Authors:** Alexandra Weiss<sup>1†</sup>, James W. Gilbert<sup>2†</sup>, Iris Valeria Rivera Flores<sup>2†</sup>, Jillian Belgrad<sup>2†</sup>, Chantal Ferguson<sup>2</sup>, Elif O. Dogan<sup>1</sup>, Nicholas Wightman<sup>1</sup>, Kit Mocarski<sup>1,3</sup>, Dimas Echeverria<sup>2</sup>, Ashley Summers<sup>2</sup>, Brianna Bramato<sup>2</sup>, Nicholas McHugh<sup>2</sup>, Raymond Furgal<sup>2</sup>, Nozomi Yamada<sup>2</sup>, David Cooper<sup>2</sup>, Kathryn Monopoli<sup>2</sup>, Bruno M.D.C. Godinho<sup>2§</sup>, Matthew R. Hassler<sup>2§</sup>, Ken Yamada<sup>2</sup>, Paul Greer<sup>3</sup>, Nils Henninger<sup>1,4</sup>, Robert H. Brown Jr.<sup>1\*</sup>, Anastasia Khvorova<sup>2,3†\*</sup>

†, ‡: These authors contributed equally to this work

\*Correspondence can be addressed to Robert H. Brown Jr. (robert.brown@umassmed.edu) and Anastasia Khvorova (anastasia.khvorova@umassmed.edu)

### Affiliations:

<sup>1</sup>Department of Neurology, UMass Chan Medical School; Worcester, MA, USA.

<sup>2</sup>RNA Therapeutics Institute, UMass Chan Medical School; Worcester, MA, USA.

<sup>3</sup>Program in Molecular Medicine, UMass Chan Medical School; Worcester, MA, USA.

<sup>4</sup>Department of Psychiatry, UMass Chan Medical School; Worcester, MA, USA.

<sup>§</sup>Current address: Atalanta Therapeutics; Boston, MA, USA.

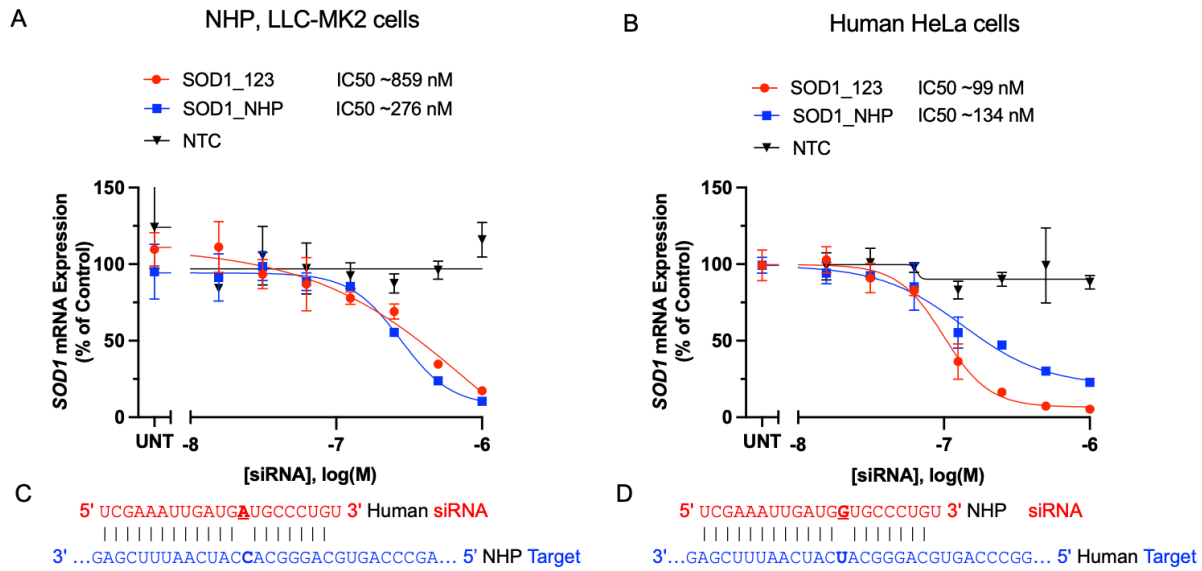

**Supplemental Figure 1: SOD1\_123 silences both human and non-human primate mRNA *in vitro*.** (A, B) 7-point dose-response curves for SOD1\_123 and SOD1\_NHP in (A) LLC-MK2 cells (NHP-derived) or (B) HeLa cells (human-derived) (n = 3, mean ± SD). HeLa and LLC\_MK2 cells were treated with siRNAs at concentrations shown for 72 h (Passive uptake). mRNA levels were measured using QuantiGene, (n=3, mean ± SD), UNT (untreated), NTC (non-targeting control). (C) Sequence of the human-targeting siRNA guide (red) against the NHP target mRNA (blue). Mismatch shown in bold. (D) Sequence of the NHP-targeting guide strand (red) against the human target mRNA (blue). Mismatch shown in bold. IC<sub>50</sub> values are shown above the graph. IC<sub>50</sub> values were calculated using the nonlinear least squares method (GraphPad Prism).

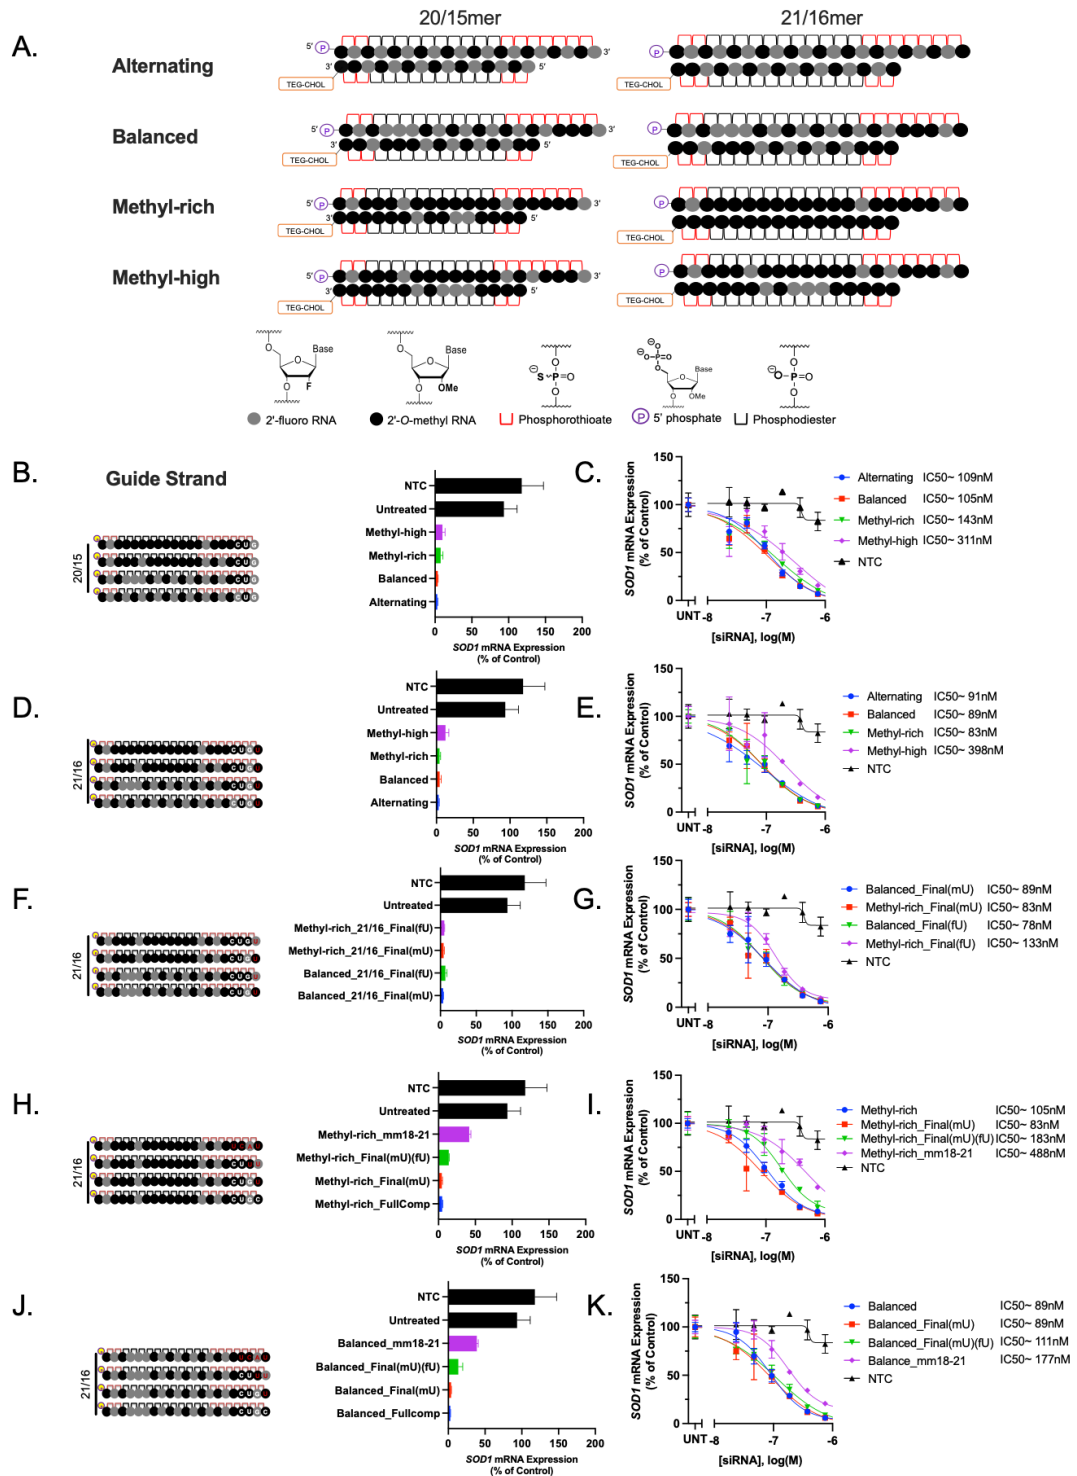

**Supplemental Figure 2: Chemical optimization of SOD1<sub>123</sub> reveals multiple potent configurations. (A) Schematic of siRNA patterns (top), and chemical modifications (bottom). (B)**

HeLa cells treated by passive uptake with SOD1\_123 in four distinct patterns. The left panel shows diagram of the guide strands. **(C)** 7-point dose-reponse curves for siRNAs in B. **(D)** HeLa cells treated (by passive uptake) with SOD1\_123 **(E)** 7-point dose-response curves for siRNAs described in D. **(F)** HeLa cells treated (by passive uptake) with the modification patterns shown **(G)** 7-point dose-response curves for siRNAs described in F. **(H)** HeLa cells treated (by passive uptake) with four SOD1\_123 siRNAs in the Methyl-rich pattern, **(I)** 7-point dose-response curves for siRNAs described in F. **(J)** As in H but in the Balanced pattern. **(K)** Dose-dependent analysis of siRNAs described in H but in the Balanced pattern. Top dose 1.5  $\mu$ M, SOD1 mRNA evaluated at 72 hours, QuantiGene, (n=3, mean  $\pm$  SD). NTC (nontargeting control siRNA), UNT (untreated). The target site and IC<sub>50</sub> values are shown in the graphs. IC<sub>50</sub> values were calculated using the nonlinear least squares method (GraphPad Prism).

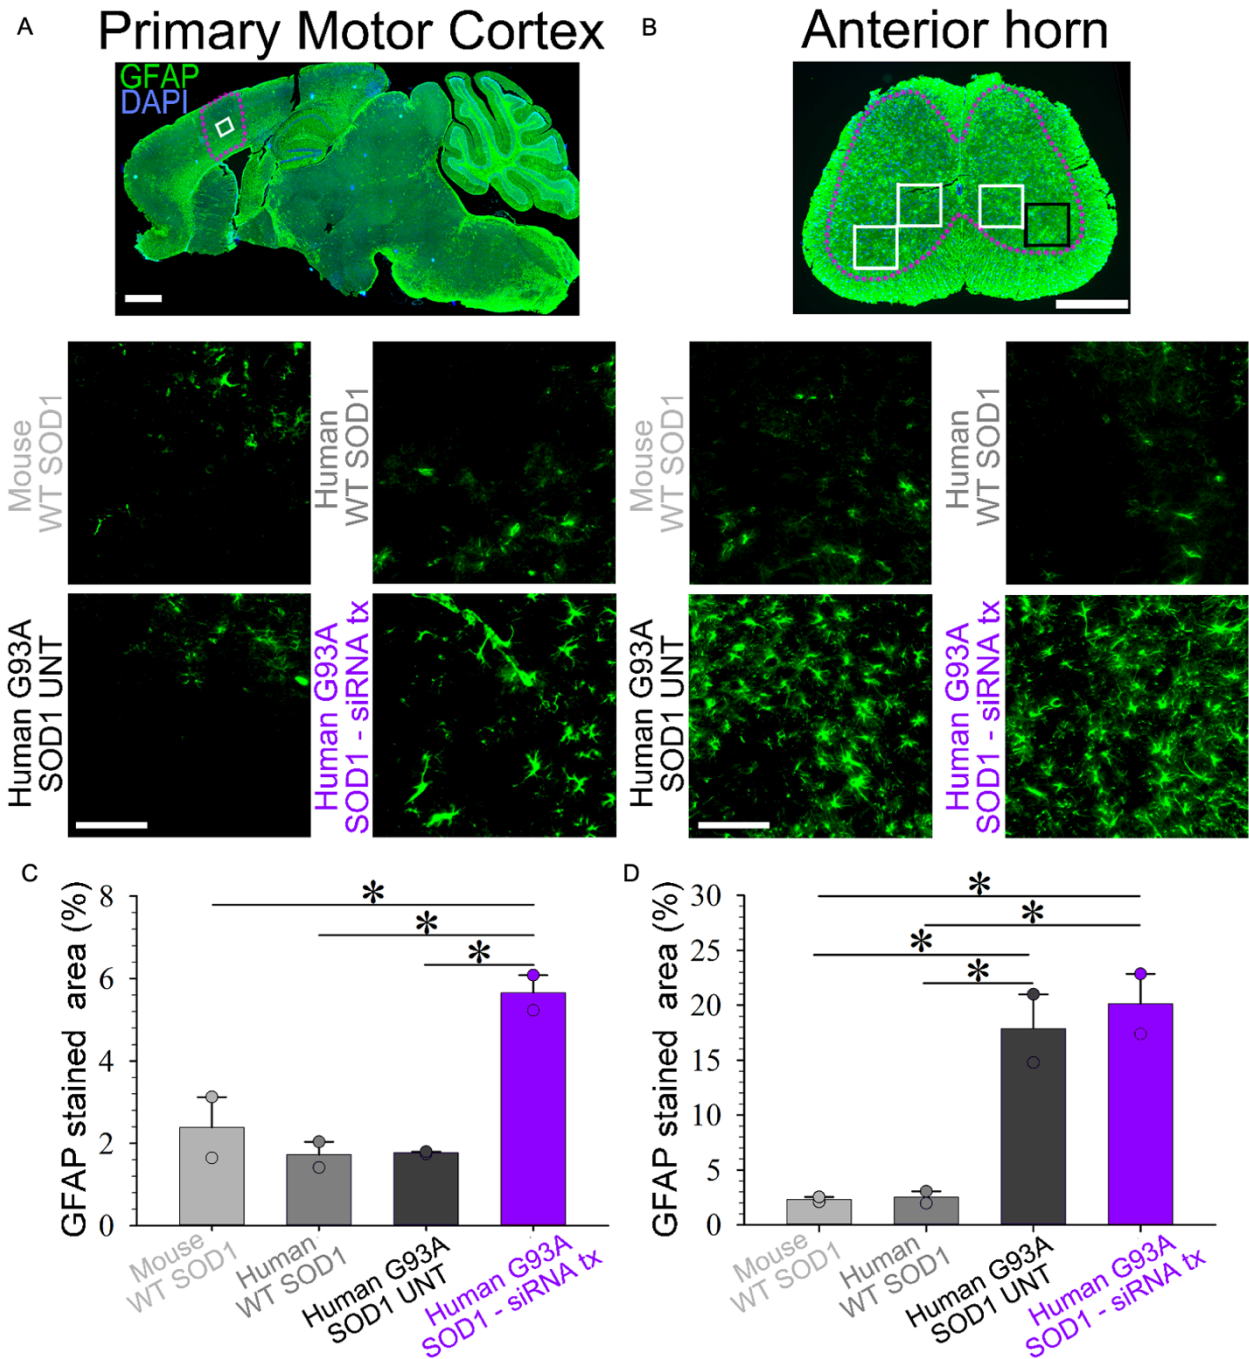

**Supplemental Figure 3: Astrogliosis in the cortex but not lumbar spinal cord of di-siRNA treated G93A mice versus untreated G93A mice. (A, B) GFAP-stained sagittal section of brain (A) and transverse lumbar spinal cord (B) images with rectangles indicate the regions of interest (ROIs) used for quantification. (C) Representative images of layer V of primary motor cortex**

and anterior horn. Scale bar=100  $\mu\text{m}$ . **(D, E)** Quantification of GFAP signal in layer V of primary motor cortex **(D)** and anterior horn of lumbar spinal cord **(E)**. Data in the bar graphs are shown as mean  $\pm$ SEM n=2 per group. One-way ANOVA with post hoc Holm-Šídák test.

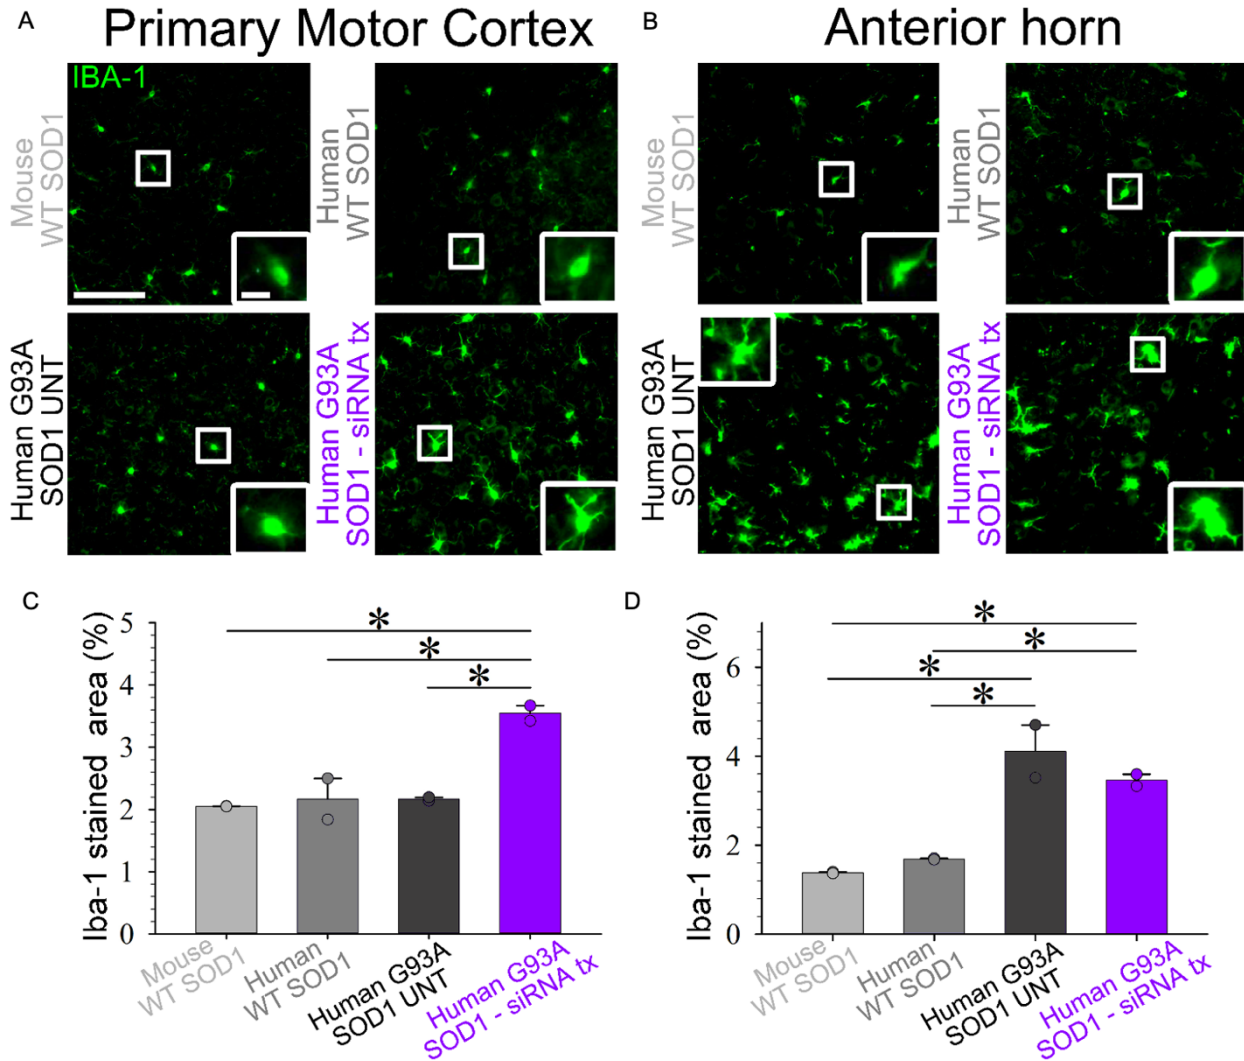

**Supplemental Figure 4: Di-siRNA treatment activates cortical microglia and attenuates microgliosis in the anterior horn.** (A) Representative images and insets of Iba-1 stained microglia in Motor cortex. Scale bar=100  $\mu\text{m}$  Scale bar=15  $\mu\text{m}$  (inset). (B) Representative images and insets of Iba-1 stained microglia in anterior horn. Scale bar=100  $\mu\text{m}$ , scale bar in inset=15  $\mu\text{m}$ . (C) Quantification of Iba-1 stained microglia in layer V of primary motor cortex and (D) anterior horn of lumbar spinal cord. Data in the bar graphs are shown as mean  $\pm$ SEM n=2 per group. One-way ANOVA with post hoc Holm-Šidák test.
